# Supplementary material for: A label-free strategy for facile electrochemical analysis of dynamic glycan expression on living cells
Source: Royal Society of Chemistry journal article supplement (doi:10.1039/b918008g), 2009-01-01
Supplement: b918008g.pdf [file b918008g.pdf]

# A label-free strategy for facile electrochemical analysis of dynamic glycan expression on living cells

Lin Ding, Wei Cheng, Xiaojian Wang, Yadong Xue, Jianping Lei, Yibing Yin and Huangxian Ju\*

Key Laboratory of Analytical Chemistry for Life Science (Education Ministry of China),

Department of Chemistry, Nanjing University, Nanjing 210093, P.R. China; and Key

Laboratory of Laboratory Medical Diagnostics (Ministry of Education of China), Department

of Laboratory Medicine, Chongqing Medical University, Chongqing 400016, P.R. China

## Experimental

**Materials.** Concanavalin A (Con A), wheat germ agglutinin (WGA), Dolichos bifows agglutinin (DBA), bovine serum albumin (BSA), 1-ethyl-3-(3-dimethylaminopropyl) carbodiimide (EDC) and 3'-Azido-3'-deoxythymidine (AZT) were purchased from Sigma-Aldrich Inc. (USA). Peanut agglutinin (PNA) was purchased from Medicago Inc. (Sweden). Fluorescein-labeled WGA (molar ratio of fluorescein/protein, F/P = 4.5), Con A (F/P = 5.7), PNA (F/P = 5.1), DBA (F/P = 2.2) were from Vector laboratories (Burlingame, USA). Mannose (Man) and *N*-acetylglucosamine (GlcNAc) with analytical grade were from Sinopharm Chemical Reagent Co., Ltd (China). Single-walled carbon nanohorns (SWNHs) were kindly provided by Prof. S. Iijima (Japan Science and Technology Agency). Single-walled carbon nanotubes (SWNTs,  $\leq 2$  nm in diameter; 5-15  $\mu\text{m}$  in length) and multi-walled carbon nanotubes (MWNTs, 20-40 nm in diameter; 5-15  $\mu\text{m}$  in length) were from Shenzhen Nanotech Co. (China). Phosphate buffer saline (PBS, pH 7.4) contained 136.7 mM NaCl, 2.7 mM KCl, 8.72 mM  $\text{Na}_2\text{HPO}_4$ , and 1.41 mM  $\text{KH}_2\text{PO}_4$ . All other reagents were of analytical grade. All aqueous solutions were prepared using ultra-pure water ( $\geq 18$

MΩ, Milli-Q, Millipore). SWNHs were dispersed in 30% HNO<sub>3</sub> and then refluxed for 24 h at 140 °C to obtain carboxylic group-functionalized SWNHs. The resulting suspension was centrifuged, and the sediment was washed with deionized water until the pH reached 6.0. Then, the oxidized SWNHs were dispersed in deionized water to a concentration of 0.5 mg mL<sup>-1</sup>. Oxidized SWNTs and MWNTs were produced by the same procedure.

**Cell culture and cell treatment.** K562 cell line was kindly provided by the Affiliated Zhongda Hospital, Southeast University, Nanjing, China. K562 cells were cultured in a flask in RPMI 1640 medium (GIBCO) supplemented with 10% fetal calf serum (FCS, Sigma), penicillin (100 μg mL<sup>-1</sup>) and streptomycin (100 μg mL<sup>-1</sup>) at 37 °C in a humidified atmosphere containing 5% CO<sub>2</sub>. The cells in the exponential growth phase were collected and separated from the medium by centrifugation at 1000 rpm for 3 min, and then washed three times with a sterile pH 7.4 PBS. The sediment was re-suspended in the PBS to obtain a homogeneous cell suspension. Cell number was determined using a Petroff-Hausser cell counter (USA). AZT-treated K562 cells were obtained by incubating the cells in culture medium in the presence of 20 μM AZT for 3 h. The K562 cells were differentiated to erythroid lineages for 4 days by addition of 1 mM sodium butyrate (NaBu) in culture medium.

**Electrode preparation.** The glassy carbon electrode (GCE) was firstly polished with 1.0, 0.3, and 0.05 μm α-Al<sub>2</sub>O<sub>3</sub> powder (Beuhler) successively. After sonication in water, the electrode was rinsed with deionized water and allowed to dry at room temperature. SWNH solution (6 μL, 0.5 mg mL<sup>-1</sup>) was dropped on the pretreated GCE and dried in a desiccator to obtain SWNHs-coated GCE, which was then immersed in 8 μL PBS solution containing 2.5 mM EDC and optimal concentration of lectin for 3 h to yield lectin-immobilized electrode. Following a rinse with 0.01 M pH 7.4 PBS, the modified electrode was soaked in 50 mM pH 7.4 Tris-HCl buffer containing 1% BSA and 0.1 M NaCl for 30 min to block the surface. 12 μL of 2.0×10<sup>6</sup> cells mL<sup>-1</sup> K562 cell suspension was dropped on the lectin-immobilized electrode and incubated at 25 °C for 1 h. After careful rinsing with 0.01 M pH 7.4 PBS to remove

noncaptured cells, the obtained electrode was ready for impedance measurement. For Con A-immobilized electrode, 1 mM  $\text{Ca}^{2+}$  and  $\text{Mn}^{2+}$  should be added to the recognition solution.

**Monosaccharide inhibition assay.** The lectin-immobilized electrode was preincubated with 12  $\mu\text{L}$  200 mM monosaccharide (Man or GlcNAc) dissolved in PBS for 1 h at 25 °C.<sup>1</sup> Then 2  $\mu\text{L}$  of K562 cell suspension at  $1.4 \times 10^7$  cells  $\text{mL}^{-1}$  was added to the monosaccharide solution on electrode surface and incubated for 1 h at 25 °C. After careful rinsing with PBS to remove the noncaptured cells and sugar, the electrode was used for impedance assay. Data shown are the percentage of control signals (the  $\Delta R_{\text{et}}$  from monosaccharide-preincubated lectin modified GCE divided by the  $\Delta R_{\text{et}}$  from PBS-preincubated lectin modified GCE).

**Optimization of lectin modification concentration.** Lectins were dissolved in 0.01 M pH 7.4 PBS containing 2.5  $\text{mg mL}^{-1}$  EDC at different concentrations (from 0.25  $\text{mg mL}^{-1}$  to 2.5  $\text{mg mL}^{-1}$ ), and then 8  $\mu\text{L}$  of the mixture was deposited on SWNH-coated GCE. After coupling, BSA blocking, and cell capturing steps, the obtained cell-captured electrodes were subjected to impedance measurements.

**Examination on the effect of cell concentration.** To demonstrate the cell concentration-dependent signal change, the lectin-immobilized electrodes were incubated with 12  $\mu\text{L}$  of K562 cell suspension at certain concentrations from  $5 \times 10^5$  to  $5 \times 10^6$  cells  $\text{mL}^{-1}$  for 1 h at 25 °C. After careful rinsing with 0.01 M pH 7.4 PBS, the electrodes were subjected to impedance measurements.

**Comparison of the cell binding capacity.** 0.5  $\text{mg mL}^{-1}$  oxidized SWNHs, SWNTs and MWNTs were dropped on glass slides, respectively, and dried in a desiccator. The subsequent WGA immobilization, BSA blocking and cell incubation steps were the same as described above. The obtained slides were subjected to optical microscopic observation.

**Flow cytometry analysis of glycan expression pattern on K562 cell surface.** K562 cells were collected by centrifugation at 1000 rpm for 6 min at room temperature. After the cells were washed with cold PBS, they were resuspended in PBS at a concentration of  $1 \times 10^7$  cells  $\text{mL}^{-1}$ . 50  $\mu\text{L}$  cell suspension was then added to the mixture of 445  $\mu\text{L}$  PBS and 5  $\mu\text{L}$  2  $\text{mg mL}^{-1}$  fluorescein-labeled lectin. For fluorescein-

labeled Con A, 1 mM  $\text{Ca}^{2+}$  and  $\text{Mn}^{2+}$  were added to the recognition solution. After incubation for 30 min, the cells were collected by centrifugation at 1000 rpm for 6 min, washed with PBS, resuspended in 500  $\mu\text{L}$  PBS, and assayed by flow cytometry. Unlabeled K562 cells were used as the negative control for estimation of autofluorescence, and relative cell-associated fluorescent intensity was obtained by subtraction of autofluorescence. For comparison purpose, the obtained relative cell-associated fluorescent intensity was standardized with the molar ratio of fluorescein/protein.

**Benzidine staining experiment.** 50  $\mu\text{L}$  cell suspension at  $1 \times 10^6$  cells  $\text{mL}^{-1}$  was mixed with 10 mL benzidine reagent containing 0.6%  $\text{H}_2\text{O}_2$ , 0.5 M acetic acid and 0.2% benzidine dihydrochloride. The percentage of benzidine staining-positive cells (blue cells) was determined by light microscopic examination of 100 cells per sample.<sup>2</sup>

**Apparatus and characterization.** The morphologies of SWNHs coated on GCE (3 mm diameter) and lectin-functionalized SWNHs/GCE were observed under a Hitachi S-4800 scanning electron microscopy (SEM, Japan) and a JEOL JEM-2100 transmission electron microscopy (TEM, Japan). Optical microscopic images were obtained by Nikon TE2000-U inverted fluorescence microscope (Japan). Infrared spectra were recorded on a Nicolet 400 Fourier transform infrared spectrometer (Madison, WI). Flow cytometry was carried out on a FACS Calibur flow cytometer (Becton Dickinson, USA). Electrochemical impedance spectroscopic measurements were performed on a PGSTAT30/FRA2 system (Autolab, Netherlands) in 10 mM pH 7.4 PBS containing 5 mM  $\text{K}_4\text{Fe}(\text{CN})_6$ , 5 mM  $\text{K}_3\text{Fe}(\text{CN})_6$  and 0.1 M KCl using a conventional three-electrode system with modified GCE as working, platinum wire as auxiliary, and saturated calomel electrode as reference electrodes. Typical impedance spectrum includes a semicircle portion and a linear line portion, which correspond to the electron transfer process and diffusion process, respectively. The diameter of the semicircle represents the electron-transfer resistance at the electrode surface. The impedance spectra were recorded within the frequency range of  $5 \times 10^{-2} - 10^5$  Hz. The amplitude of the applied sine wave potential was 5 mV. All the experiments were performed at 25 °C. All  $R_{\text{et}}$  value was obtained from three independent experiments, and error bars represent the S.D. of the mean.

## Infrared characterization of coupling of lectin to SWNHs<sup>3</sup>

After Con A coupling, two new absorption bands corresponding to amide band I (C=O stretching) and II (N-H bending) appeared at 1640 and 1525  $\text{cm}^{-1}$ , respectively, and the peaks at 1723 and 1581  $\text{cm}^{-1}$  attenuated.

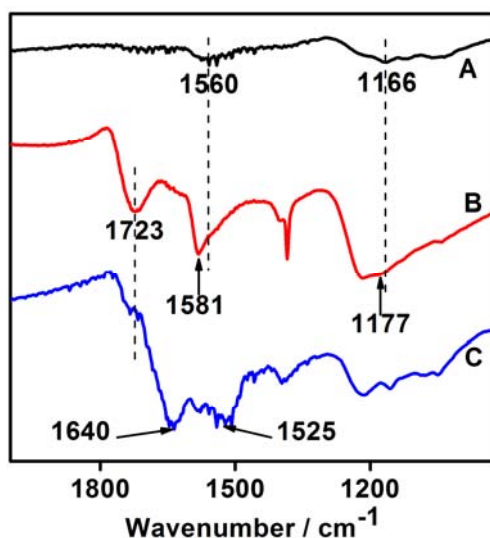

**Fig. S1.** Infrared spectra of (A) SWNHs, (B) oxidized SWNHs and (C) Con A-SWNHs conjugates.

## SEM and TEM characterization of lectin coupling to SWNHs.

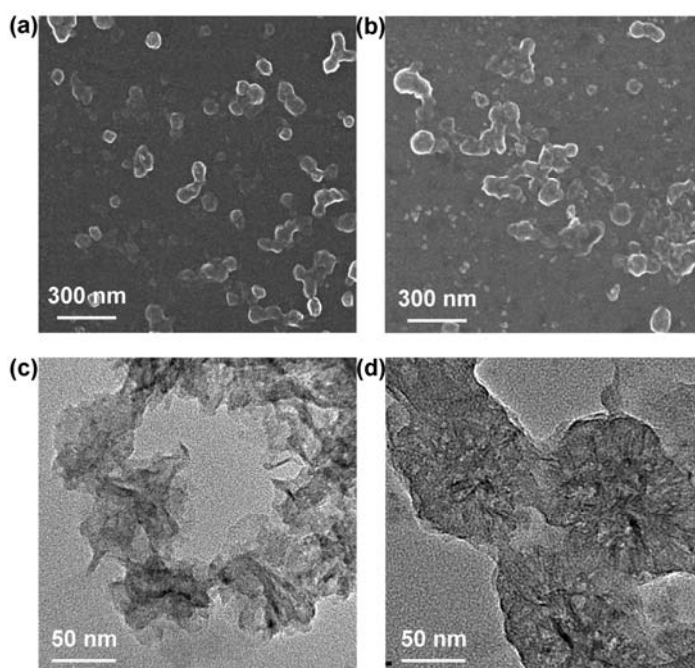

**Fig. S2** SEM images of (a) SWNHs/GCE and (b) Con A-SWNHs/GCE, and TEM images of (c) SWNHs and (d) Con A-SWNHs conjugates.

## Comparison of cell capture capacity of lectin-functionalized carbon nanomaterials

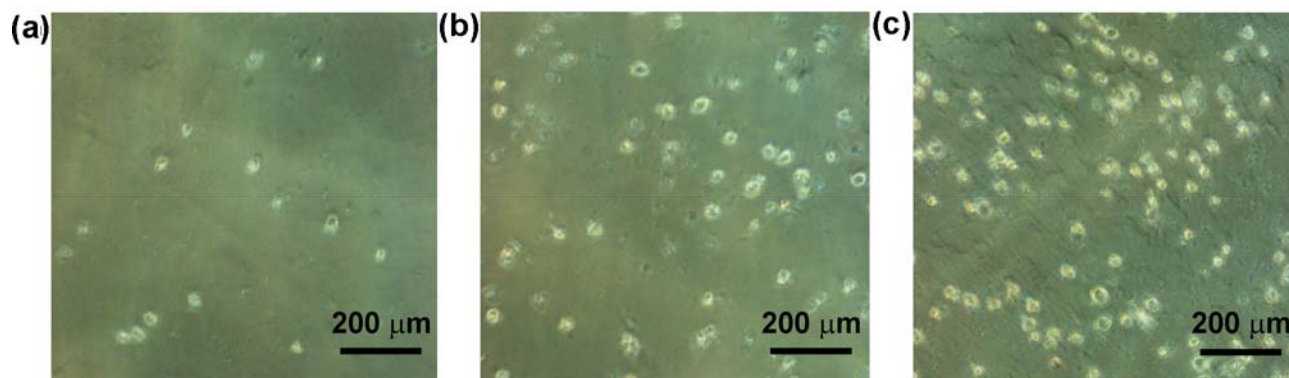

**Fig. S3** Optical microscopic images of K562 cells captured on WGA-functionalized (a) single-walled carbon nanotubes, (b) multi-walled carbon nanotubes and (c) SWNHs on glass slides. The nanomaterial interface was fabricated by the same procedure as described in the Experimental section.

**Table S1** Carbohydrate-binding specificities of the lectins used in this work<sup>4</sup>

| Lectins | Origin                      | Binding specificity <sup>a</sup>                                                      | Optimized concentration for immobilization (mg mL <sup>-1</sup> ) |
|---------|-----------------------------|---------------------------------------------------------------------------------------|-------------------------------------------------------------------|
| Con A   | <i>Canavalia ensiformis</i> | terminal $\alpha$ -Man, Man $\alpha$ 3(Man $\alpha$ 6)Man                             | 2.0                                                               |
| DBA     | <i>Dolichos biflorus</i>    | GalNAc $\alpha$ -Ser/Thr (Tn), GalNAc $\alpha$ 1-3GalNAc                              | 0.5                                                               |
| PNA     | <i>Arachis hypogaea</i>     | Gal $\beta$ 1-3GalNAc $\alpha$ -Ser/Thr, Gal $\beta$ 1-3GalNAc $\beta$ 1-4Gal $\beta$ | 1.0                                                               |
| WGA     | <i>Triticum unlgari</i>     | (GlcNAc) <sub>n</sub> , multivalent Sia                                               | 1.5                                                               |

<sup>a</sup> Man, mannose; GalNAc, *N*-acetylgalactosamine; Gal, galactose; Sia, sialic acid; GlcNAc, *N*-acetylglucosamine; Ser, serine; Thr, threonine.

## Flow cytometric analysis of the glycan expression pattern on K562 cell surface

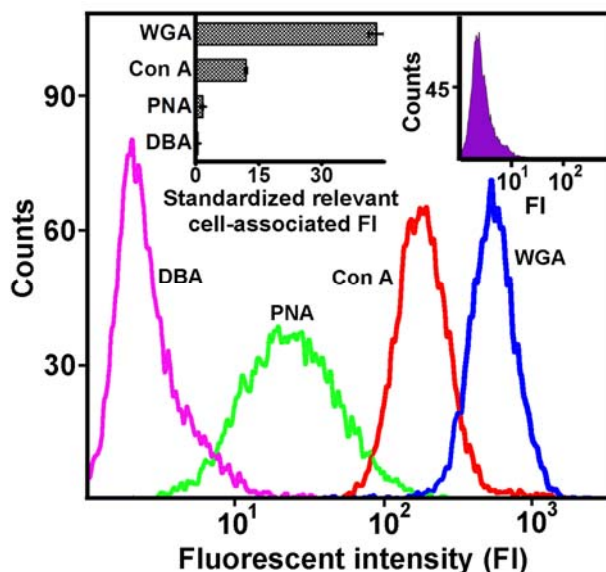

**Fig. S4** Flow cytometric analysis of lectin-binding sites on K562 cells with fluorescein-labeled DBA, PNA, Con A, and WGA at room temperature. Inset: standardized relative cell-associated fluorescent intensity of K562 cells after incubation with fluorescein-labeled lectins (*left*), and autofluorescence of unlabeled K562 cells (*right*).

## References

- 1 K. T. Pilobello, D. E. Slawek and L. K. Mahal, *Proc. Nat. Acad. Sci. USA*, 2007, **104**, 11534-11539.
- 2 N. Belhacène, L. Maulon, S. Guérin, J. E. Ricci, B. Mari, Y. Colin, J. P. Cartron and P. Auberger, *FASEB J.*, 1998, **12**, 531-539.
- 3 M. Zhang, M. Yudasaka, K. Ajima, J. Miyawaki and S. Iijima, *ACS Nano*, 2007, **1**, 265-272.
- 4 K. A. Wearne, H. C. Winter, K. O'Shea and I. J. Goldstein, *Glycobiology*, 2006, **16**, 981-990.
